# Supplementary material for: Impacts of hypoxia on estuarine macroinvertebrate assemblages across a regional nutrient gradient
Source: Atypon-hosted journal article supplement (doi:10.1139/facets-2017-0044), 2018-01-18
Supplement: facets-2017-0044_supplement1.pdf [file facets-2017-0044_supplement1.pdf]

1 **Supplementary Material**

2 Table S1 – Results from PERMANOVA tests of fixed (Vegetation and Month) and random  
 3 (Site(Vegetation) factor effects on faunal community composition. Columns headed by the  
 4 abbreviations df, SS and MS are for degrees of freedom, Sums of Squares and Mean Square,  
 5 respectively. Statistically significant differences,  $p \leq 0.05$ , are in bold.

| Epifauna                 |     |          |        |          |              |                                    |
|--------------------------|-----|----------|--------|----------|--------------|------------------------------------|
| Source                   | df  | SS       | MS     | Pseudo-F | P(perm)      | Estimate of component of variation |
| Vegetation               | 1   | 16422    | 16422  | 2.58     | <b>0.045</b> | 11.01                              |
| Month                    | 2   | 1480     | 740.02 | 0.66195  | 0.771        | 0                                  |
| Site (Vegetation)        | 11  | 69945    | 6358.6 | 33.304   | <b>0.001</b> | 20.28                              |
| Vegetation x Month       | 2   | 2572     | 1286   | 1.1503   | 0.321        | 2.46                               |
| Site(Vegetation) x Month | 22  | 24595    | 1117.9 | 5.8554   | <b>0.001</b> | 13.62                              |
| Residuals                | 156 | 29784    | 190.92 |          |              | 13.82                              |
| Total                    | 194 | 1.46 e-5 |        |          |              |                                    |
| Infauna                  |     |          |        |          |              |                                    |
| Vegetation               | 1   | 19222    | 19222  | 4.86     | <b>0.008</b> | 14.40                              |
| Month                    | 2   | 1553.1   | 776.56 | 1.23     | 0.306        | 1.71                               |
| Site (Vegetation)        | 11  | 45366    | 4124.2 | 11.88    | <b>0.001</b> | 16.47                              |
| Vegetation x Month       | 2   | 1750.8   | 875.41 | 1.39     | 0.2          | 3.14                               |
| Site(Vegetation) x Month | 19  | 12032    | 633.26 | 1.8244   | <b>0.001</b> | 7.47                               |
| Residuals                | 150 | 52066    | 347.11 |          |              | 18.63                              |
| Total                    | 185 | 1.37e-5  |        |          |              |                                    |

6

7

8 Table S2 – PERMANOVAs were performed on Bray-Curtis distances for epi- and  
 9 infauna communities, respectively. Site was a random factor and Month was fixed.  
 10 Statistically significant differences,  $p \leq 0.05$ , are in bold.

11  
 12  
 13

|          |                  | <i>Z. marina</i>                 |     |          |        |          |              |                                    |  |
|----------|------------------|----------------------------------|-----|----------|--------|----------|--------------|------------------------------------|--|
|          |                  | Source                           | Df  | SS       | MS     | Pseudo-F | P            | Estimate of component of variation |  |
| Epifauna |                  | Site                             | 3   | 24982    | 8327.3 | 48.521   | <b>0.001</b> | <b>23.32</b>                       |  |
|          |                  | Site x Month (pooled with Month) | 8   | 4016.5   | 502.06 | 2.925    | <b>0.001</b> | <b>8.13</b>                        |  |
|          |                  | Residuals                        | 48  | 8238     | 171.62 |          |              | 13.1                               |  |
|          |                  | Total                            | 59  | 37236    |        |          |              |                                    |  |
|          | <i>Ulva spp.</i> |                                  |     |          |        |          |              |                                    |  |
|          |                  | Site                             | 8   | 44963    | 5620.3 | 28.172   | <b>0.001</b> | <b>19.01</b>                       |  |
|          |                  | Month                            | 2   | 4499.7   | 2249.8 | 1.6739   | 0.095        | 4.49                               |  |
|          |                  | Site x Month                     | 16  | 21505    | 1344   | 6.737    | <b>0.001</b> | <b>15.13</b>                       |  |
|          |                  | Residuals                        | 108 | 21546    | 199.5  |          |              | 14.13                              |  |
|          |                  | Total                            | 134 | 92513    |        |          |              |                                    |  |
|          |                  | <i>Z. marina</i>                 |     |          |        |          |              |                                    |  |
|          |                  | Source                           | Df  | SS       | MS     | Pseudo-F | P            | Estimate of component of variation |  |
| Infauna  |                  | Site                             | 3   | 55681    | 18560  | 12.883   | <b>0.001</b> | <b>35.58</b>                       |  |
|          |                  | Site x Month (pooled with Month) | 7   | 18878    | 2696.9 | 1.872    | <b>0.001</b> | 15.71                              |  |
|          |                  | Residuals                        | 45  | 64828    | 1440.6 |          |              | 37.96                              |  |
|          |                  | Total                            | 55  | 1.418e-5 |        |          |              |                                    |  |
|          | <i>Ulva spp.</i> |                                  |     |          |        |          |              |                                    |  |
|          |                  | Site                             | 8   | 1.387e-5 | 17327  | 8.8455   | <b>0.001</b> | <b>32.73</b>                       |  |
|          |                  | Month                            | 2   | 11065    | 5532.4 | 1.5075   | 0.087        | 6.63                               |  |
|          |                  | Site x Month                     | 15  | 55103    | 3673.5 | 1.8753   | <b>0.001</b> | <b>18.53</b>                       |  |
|          |                  | Residuals                        | 104 | 2.037e-5 | 1958.9 |          |              | 44.26                              |  |
|          |                  | Total                            | 129 | 4.057e-5 |        |          |              |                                    |  |
